# Supplementary material
Source: PubMed Central journal article supplement (PMC3294958)
Supplement: supp_56.3.1390_FigS1.pdf [file supp_56.3.1390_FigS1.pdf]

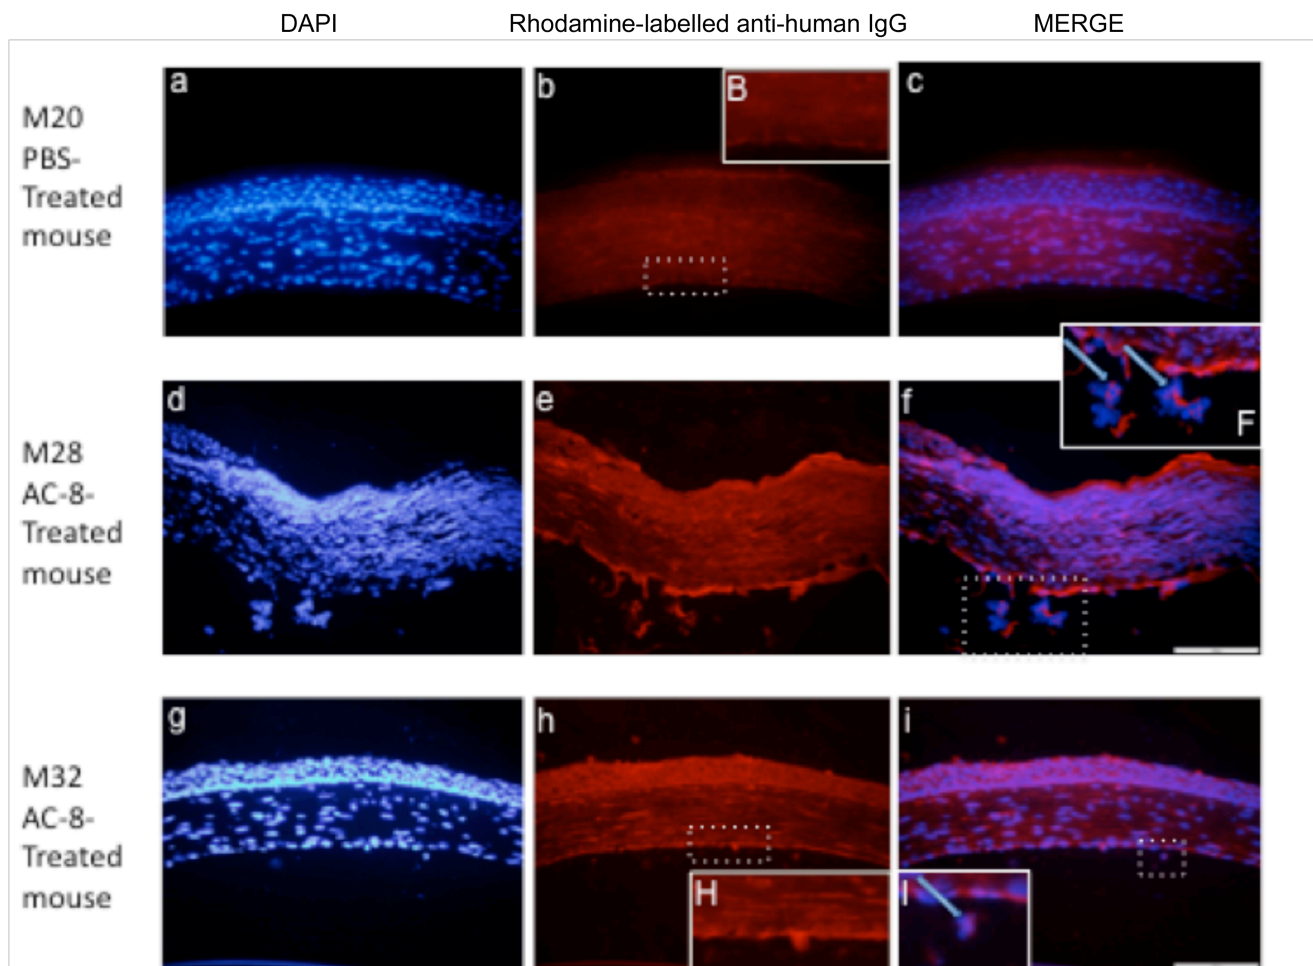

FIG. S1. Immunohistochemical analysis of the central corneas of HSV-1 KOS-infected mice. Six hours after the last of 7 instillations a day over 8 days of AC-8, 1 mg/mL (mouse #28, d-f and F; mouse #32, g-i, H-I, inserts=higher magnifications); Six hours after the last of 7 instillations a day over 8 days of PBS (vehicle, mouse #20, a-c, B= higher magnification). Left photos: DAPI staining (blue); middle: Rhodamine-labelled anti human IgG antibody (red) (Byosis Goat Anti-Human IgG 1/50; Pierce ImmunoPure Anti-Goat IgG Rhodamine (TRITC) : 1/50); right: merge. Bar = 200  $\mu$ m.
